# Supplementary material
Source: PubMed Central journal article supplement (PMC8596956)
Supplement: NIHMS1747190-supplement-Supplementary_Material.pdf [file NIHMS1747190-supplement-Supplementary_Material.pdf]

## **SUPPLEMENTARY MATERIAL**

for

### **Rapid preparation of nanodiscs for biophysical studies**

Jeffrey A. Julien<sup>1</sup>, Martin G. Fernandez<sup>1</sup>, Katrina M. Brandmier<sup>1</sup>, Joshua T. Del Mundo<sup>2</sup>,  
Carol M. Bator<sup>3</sup>, Lucie A. Loftus<sup>1</sup>, Esther W. Gomez<sup>2</sup>, Enrique D. Gomez<sup>2,4</sup>, Kerney  
Jebrell Glover<sup>1\*</sup>

<sup>1</sup>Department of Chemistry, Lehigh University, Bethlehem, Pennsylvania 18015, U.S.A.

<sup>2</sup>Department of Chemical Engineering, The Pennsylvania State University, University  
Park, Pennsylvania 16802, U.S.A.

<sup>3</sup>Huck Institutes of Life Sciences, Cryo-EM Facility, The Pennsylvania State University,  
University Park, Pennsylvania 16802, U.S.A.

<sup>4</sup>Department of Materials Science and Engineering, The Pennsylvania State University,  
University Park, Pennsylvania 16802, U.S.A.

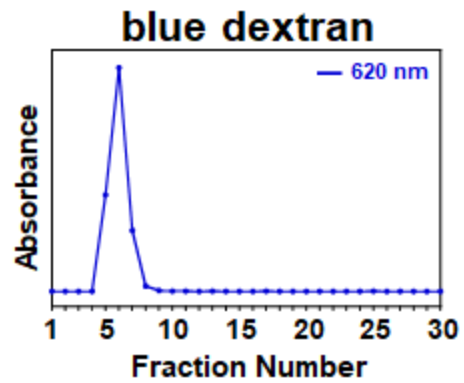

**Figure S1.** 7 mL Sephadex<sup>®</sup> G-25 elution profile of 1 mg/mL blue dextran.

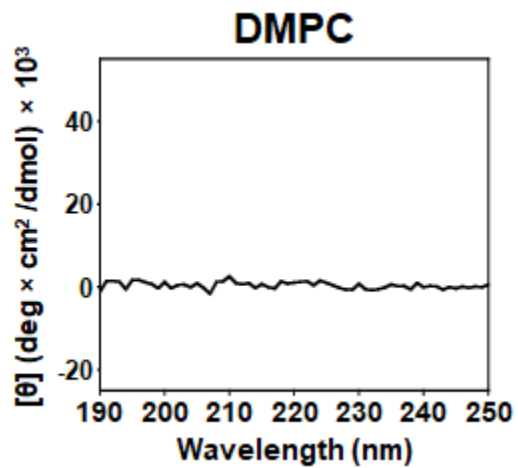

**Figure S2.** Circular dichroism spectrum of 384 μM DMPC in 10 mM sodium phosphate pH 7.4, 50 mM Na<sub>2</sub>SO<sub>4</sub>, 16 mM sodium dodecyl sulfate (SDS) at 25°C. [θ] is mean residue ellipticity.
